# Supplementary material for: Imetelstat Induces Leukemia Stem Cell Death in Pediatric Acute Myeloid Leukemia Patient-Derived Xenografts
Source: MDPI journal article supplement (doi:10.3390/jcm11071923), 2022-03-30
Supplement: s1 [file s1]

# **Imetelstat Induces Leukemia Stem Cell Death in Pediatric Acute Myeloid Leukemia Patient-derived Xenografts**

Sonali P. Barwe<sup>1</sup>, Fei Huang<sup>2</sup>, E. Anders Kolb<sup>1</sup>, Anilkumar Gopalakrishnapillai<sup>1</sup> \*

<sup>1</sup>Nemours Centers for Childhood Cancer Research and Cancer & Blood Disorders, Nemours Children's Health, Wilmington, DE 19803

<sup>2</sup>Geron Corporation, Parsippany, NJ 07054

\*Address of correspondence:

Anilkumar Gopalakrishnapillai

Nemours Center for Childhood Cancer Research

Nemours Children's Health

Wilmington, DE 19803

Phone: (302) 651-4833

Fax: (302) 651-4827

Email: anil.g@nemours.org

**Keywords:** Pediatric acute myeloid leukemia, patient-derived xenograft models, Imetelstat, telomerase, leukemia stem cells

**Disclosures:** F.H. is an employee of Geron Corporation. Other authors declare no potential conflicts of interest.

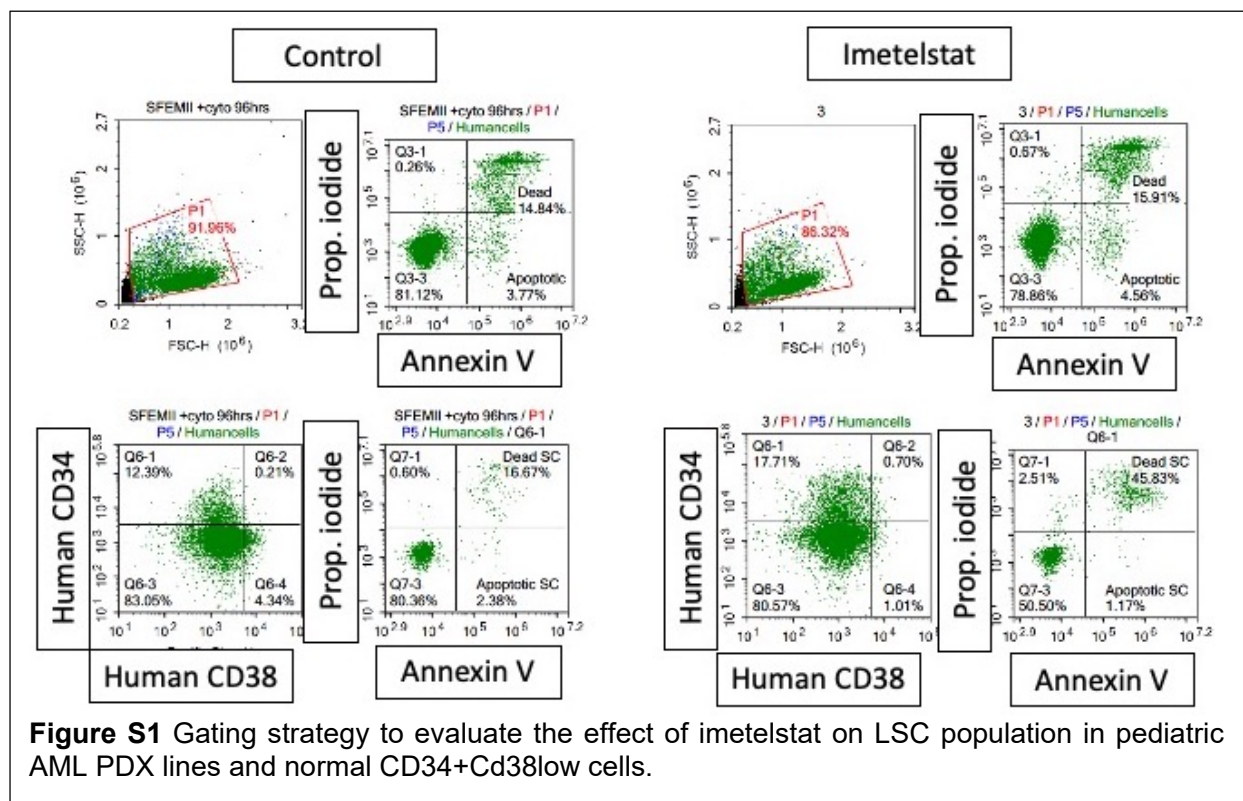

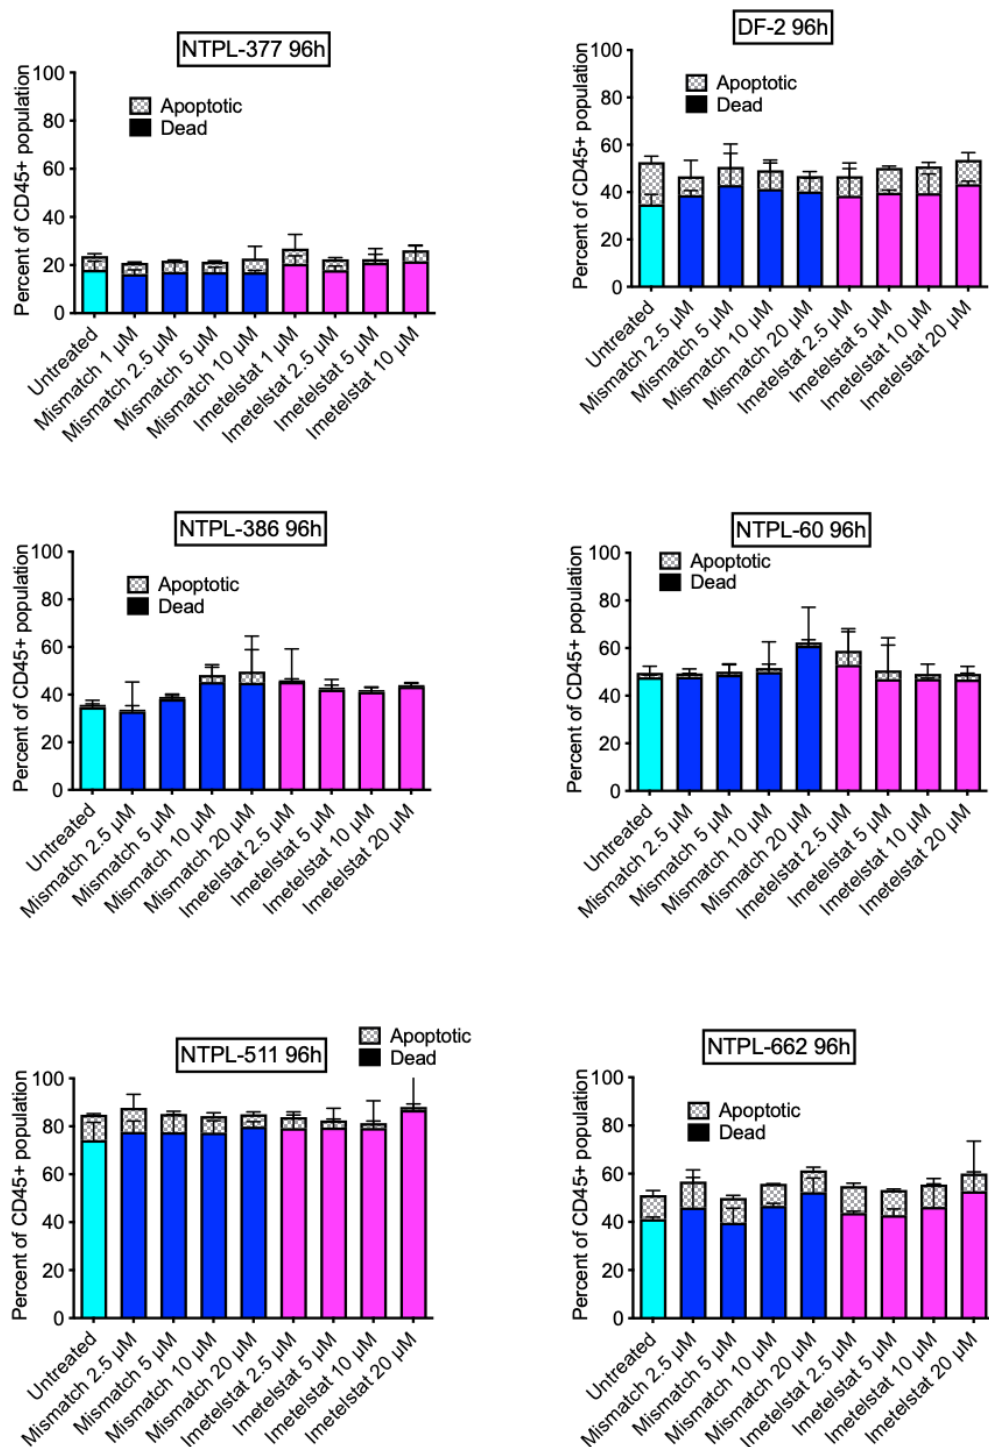

**Figure S2** Imetelstat had minimal effect on the percentage of dead cells in pediatric AML PDX lines. Error bars denote SD of the mean from 2 independent experiments in duplicates.

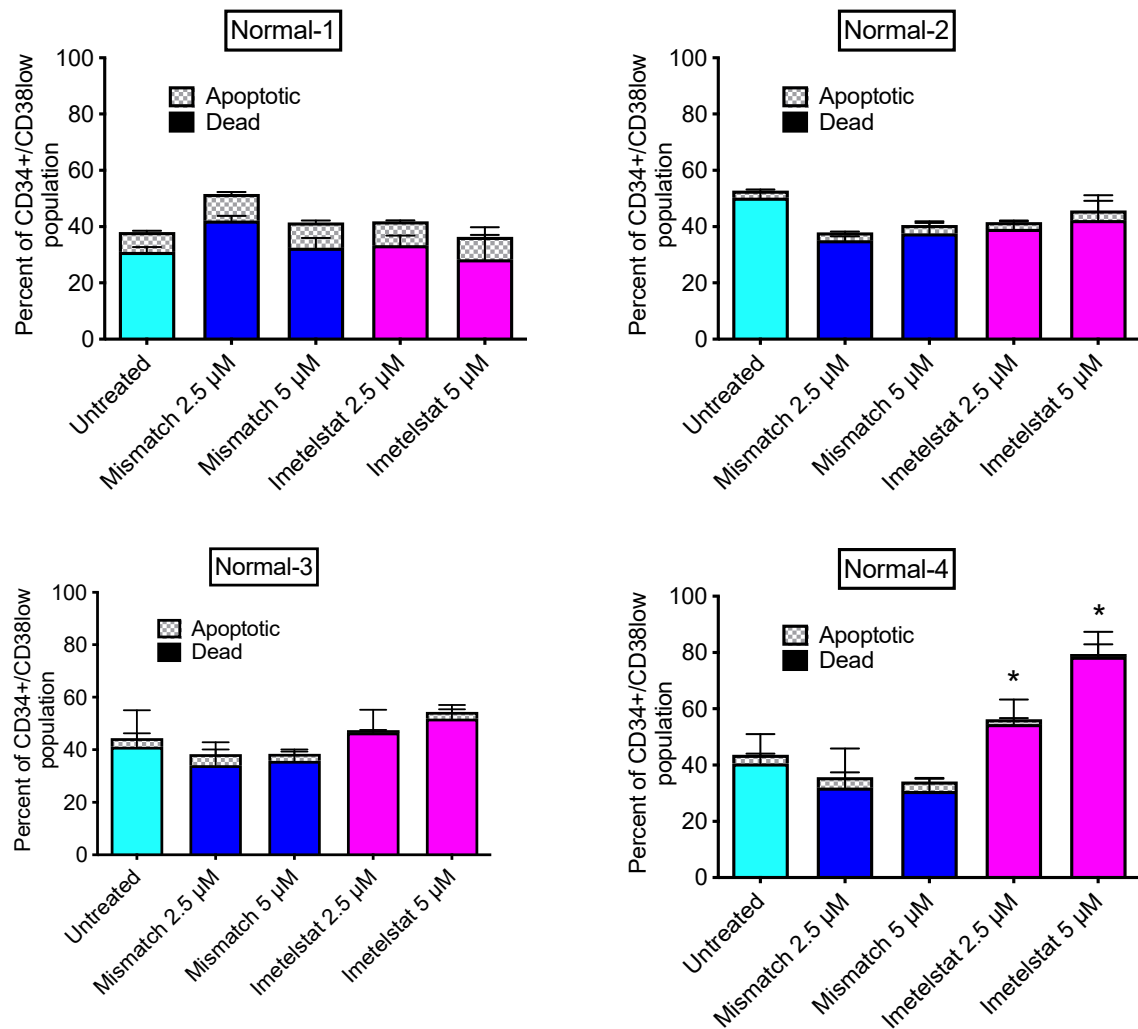

**Figure S3** Effect of imetelstat on the viability of CD34+CD38low population in normal pediatric bone marrow samples at 96h post treatment. Error bars denote SD of the mean from 2 independent experiments. \*P < 0.05.

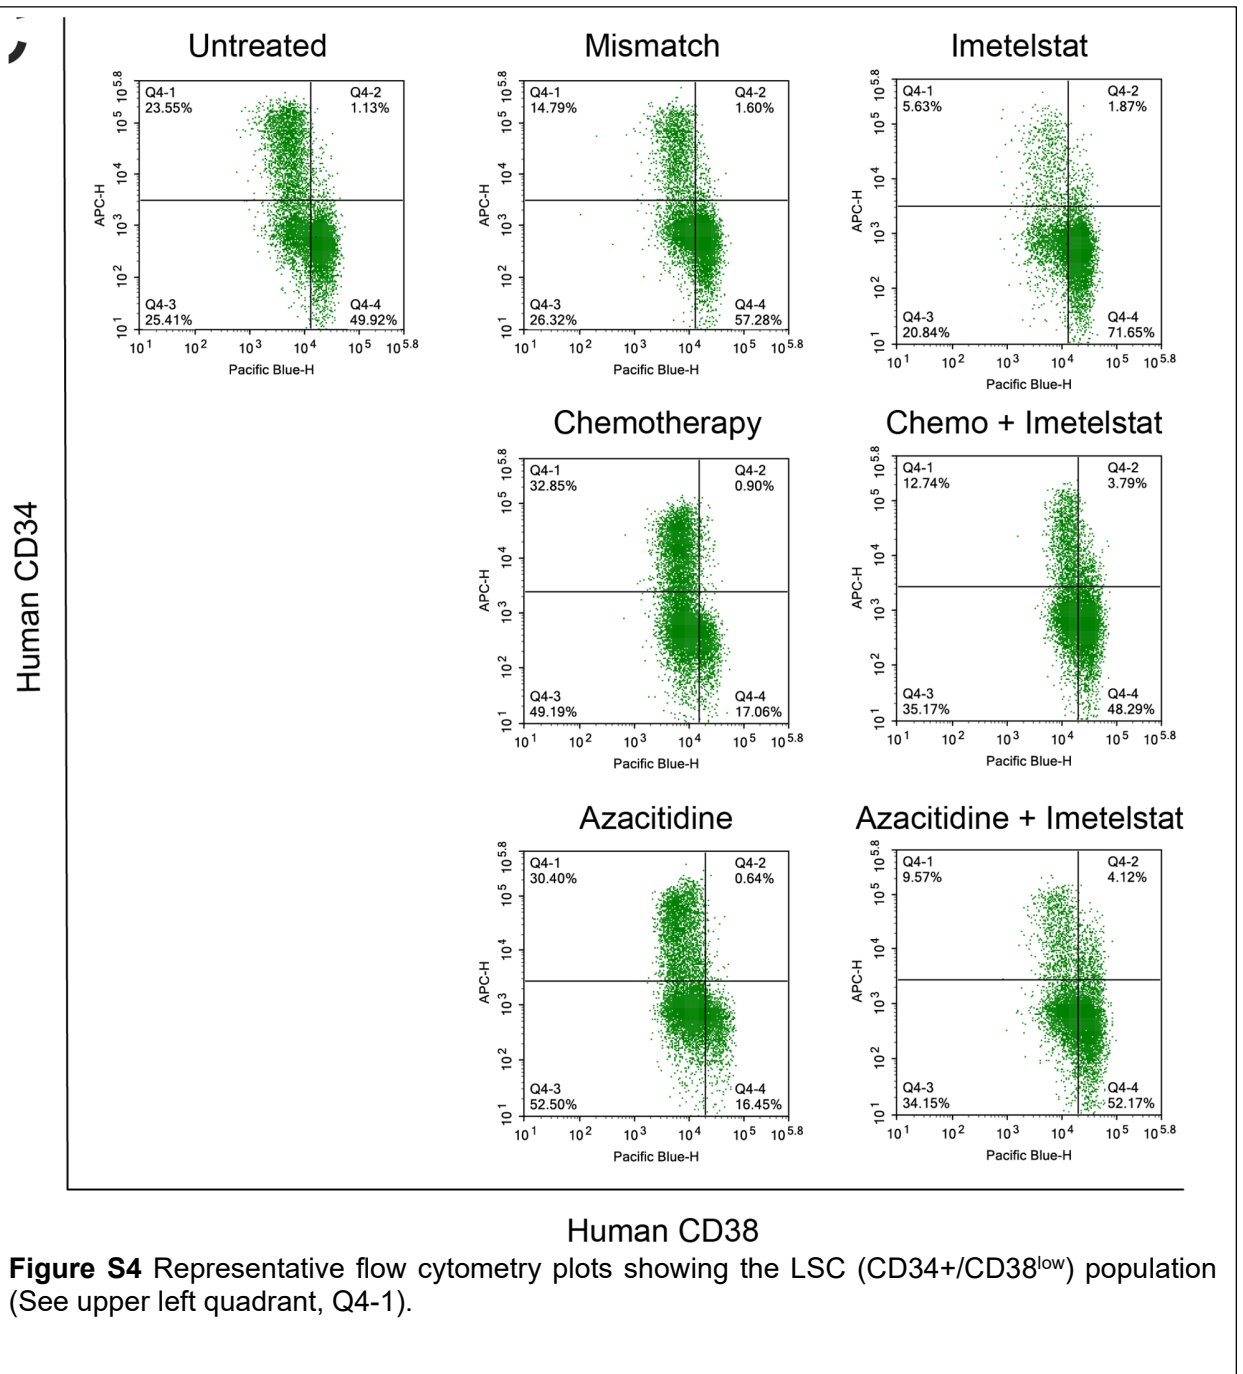

**Supplementary Table S1**

Two-way ANOVA analysis to compare the effect between treatment groups on percentage of LSC population (CD34+CD38low population) in the terminal bone marrow samples isolated from mice treated with either single agent or in combination.

|                                                                |                               |                         |         |                   |          |
|----------------------------------------------------------------|-------------------------------|-------------------------|---------|-------------------|----------|
| NTPL-377                                                       |                               |                         |         |                   |          |
| ANOVA table                                                    | Sums of Squares (SS) Type III | Degrees of freedom (DF) | Mean SS | F (DFn, DFd)      | P value  |
| Interaction                                                    | 84.32                         | 2                       | 42.16   | F (2, 19) = 6.680 | P=0.0064 |
| Column Factor (Mismatch or <b>Imetelstat</b> )                 | 1411                          | 1                       | 1411    | F (1, 19) = 223.6 | P<0.0001 |
| Row Factor ( <b>Combination</b> : chemotherapy or azacitidine) | 637.7                         | 2                       | 318.8   | F (2, 19) = 50.52 | P<0.0001 |

|                                                                |                               |                         |         |                   |          |
|----------------------------------------------------------------|-------------------------------|-------------------------|---------|-------------------|----------|
| DF-2                                                           |                               |                         |         |                   |          |
| ANOVA table                                                    | Sums of Squares (SS) Type III | Degrees of freedom (DF) | Mean SS | F (DFn, DFd)      | P value  |
| Interaction                                                    | 41.44                         | 2                       | 20.72   | F (2, 22) = 3.126 | P=0.0638 |
| Column Factor (Mismatch or <b>Imetelstat</b> )                 | 494.1                         | 1                       | 494.1   | F (1, 22) = 74.55 | P<0.0001 |
| Row Factor ( <b>Combination</b> : chemotherapy or azacitidine) | 88.07                         | 2                       | 44.04   | F (2, 22) = 6.644 | P=0.0055 |
